# Supplementary material for: Anisotropic electrical conductivity in polymer derived ceramics induced by graphene aerogels
Source: Royal Society of Chemistry journal article supplement (doi:10.1039/c7tc03846a), 2017-01-01
Supplement: c7tc03846a1.pdf [file c7tc03846a1.pdf]

## Supplementary information

### Graphene Aerogel Induced Anisotropic Electrical Conductivity in Polymer

#### Derived Ceramics

Chen Shen<sup>a,d,h</sup>, Jean E. Calderon<sup>b,d,h</sup>, Elizabeth Barrios<sup>a,d</sup>, Mikhael Soliman<sup>a,d</sup>, Ali Khater<sup>c,d</sup>,  
Aadithya Jeyaranjan<sup>a</sup>, Laurene Tetard<sup>c,d</sup>, Ali Gordon<sup>e</sup>, Sudipta Seal<sup>a,d,f,g</sup>, Lei Zhai<sup>b,d,\*</sup>

*a. Department of Materials Science and Engineering, University of Central Florida, Orlando, Florida 32826, USA*

*b. Department of Chemistry, University of Central Florida, Orlando, Florida 32826, USA*

*c. Department of Physics, University of Central Florida, Orlando, Florida 32826, USA*

*d. NanoScience Technology Center, University of Central Florida, Orlando, Florida 32826, USA.*

*e. Department of Mechanical and Aerospace Engineering, University of Central Florida, Orlando, Florida 32826, USA.*

*f. Advanced Materials Processing and Analysis Center, University of Central Florida, Orlando, Florida 32804, USA.*

*g. College of Medicine, University of Central Florida, Orlando, Florida 32827, USA.*

*h. CS and JEC have equal contribution to the project.*

*\*E-mail: [lzhai@ucf.edu](mailto:lzhai@ucf.edu)*

| RGO Density (mg/mL) | Specific Surface Area (m <sup>2</sup> /g) |
|---------------------|-------------------------------------------|
| 10                  | 407                                       |
| 20                  | 185                                       |
| 30                  | 159                                       |
| 40                  | 142                                       |

**Table S1.** Specific surface area of rGO aerogels with different rGO density.

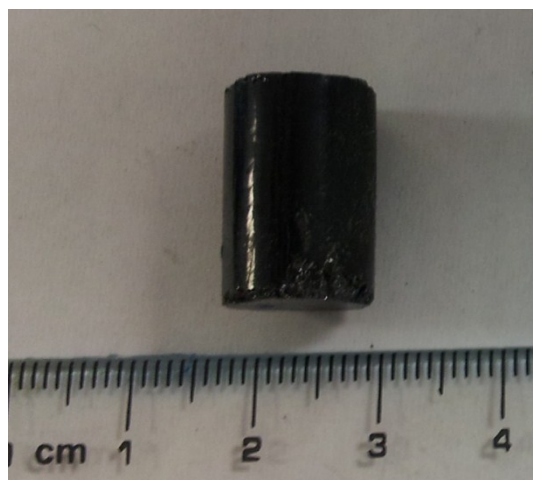

**Fig. S1** A picture of bulk SiCN/rGOA composite.

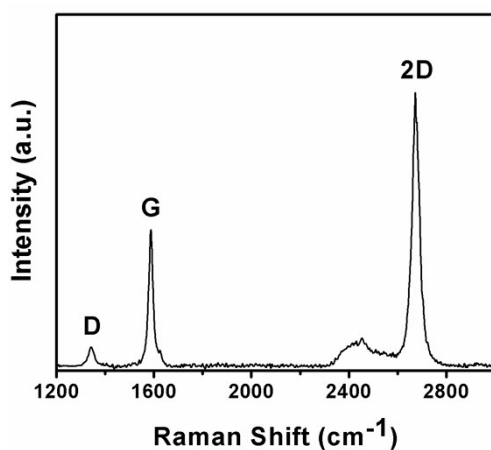

**Fig. S2** Raman spectrum of single layer graphene transferred onto a quartz slide.

The quality of CVD graphene transferred onto quartz slides was verified by using Raman spectroscopy. The characteristic peaks of graphene, namely the G band ( $1587\text{ cm}^{-1}$ ), the 2D band ( $2673\text{ cm}^{-1}$ ), and the D band ( $1343\text{ cm}^{-1}$ ) are labeled in Figure S5. The intensity ratio between the 2D band and G band is 2.0.<sup>2,3</sup> In addition, the D band which corresponds to defects in graphene only shows a small intensity, verifying the high quality of the graphene.<sup>4,5</sup>

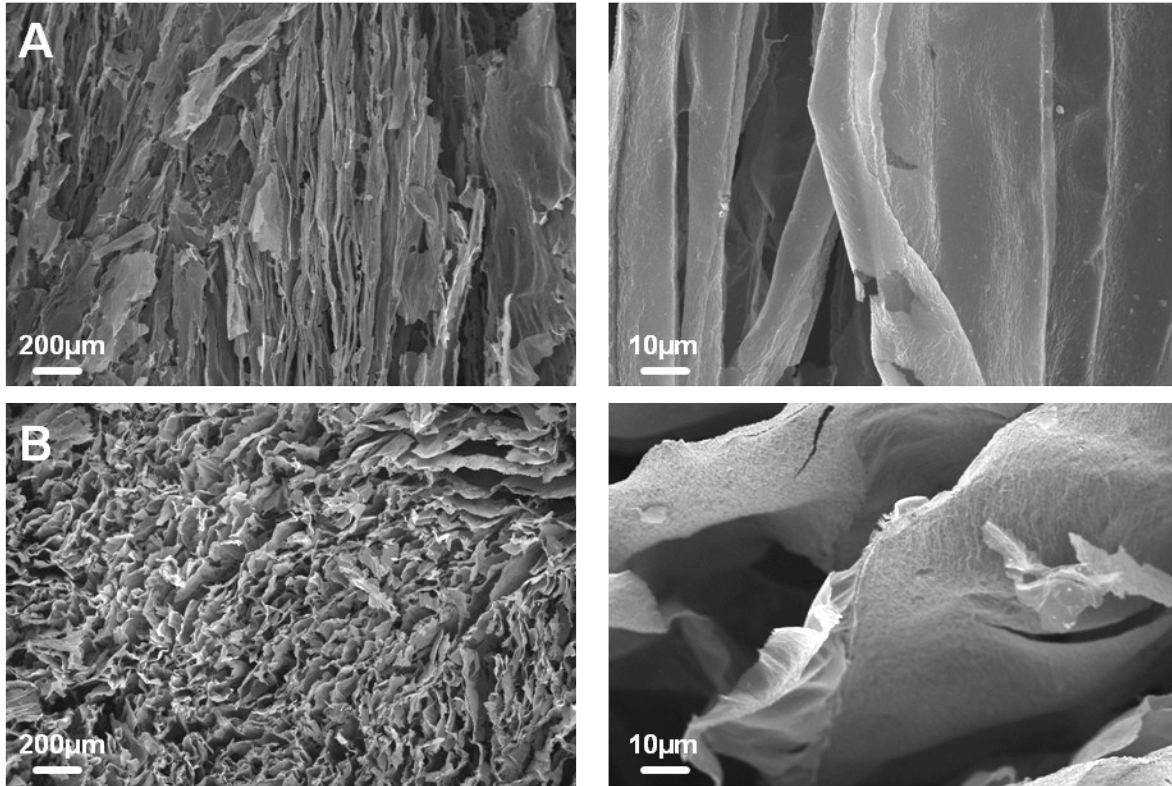

**Fig. S3** SEM images of longitudinal (A) and transversal (B) section of 30mg/mL rGO aerogel.

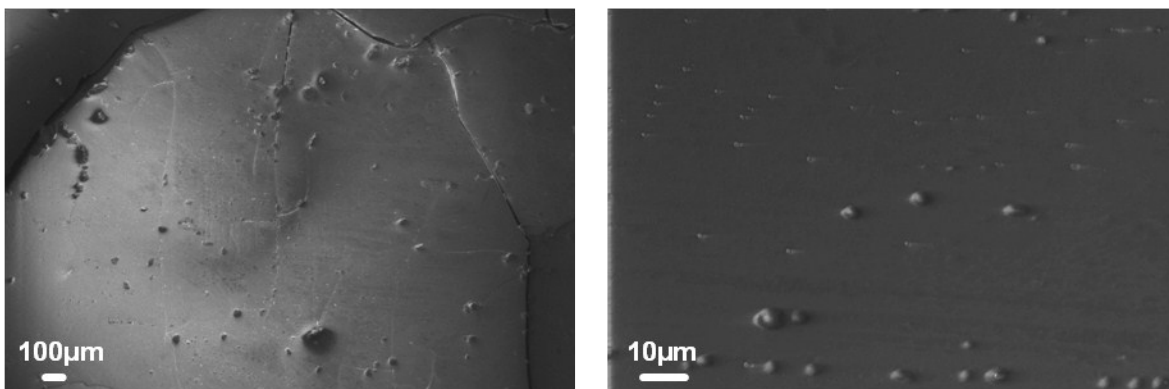

**Fig. S4** SEM images of SiCN ceramic surfaces at low (left) and high (right) magnification.

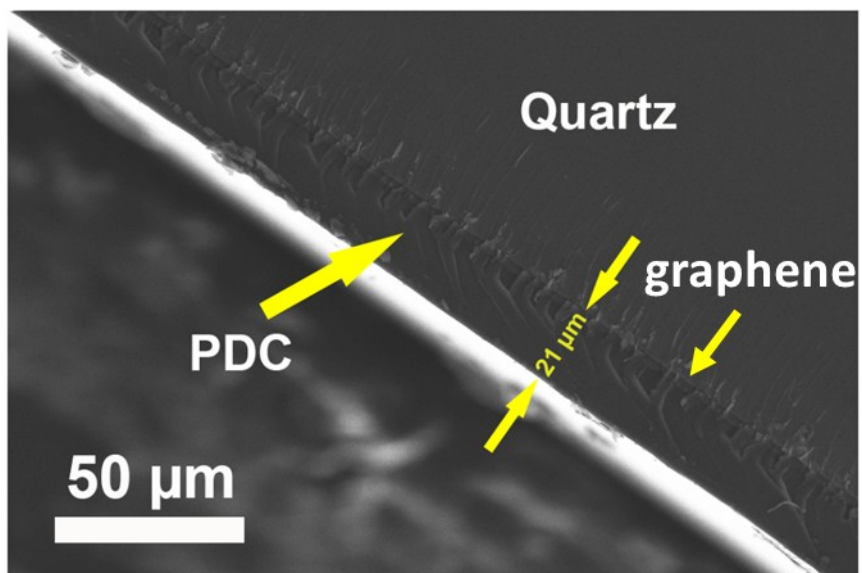

**Fig. S5** The SEM image of a SiCN film on graphene embedded between PDC and quartz slide.

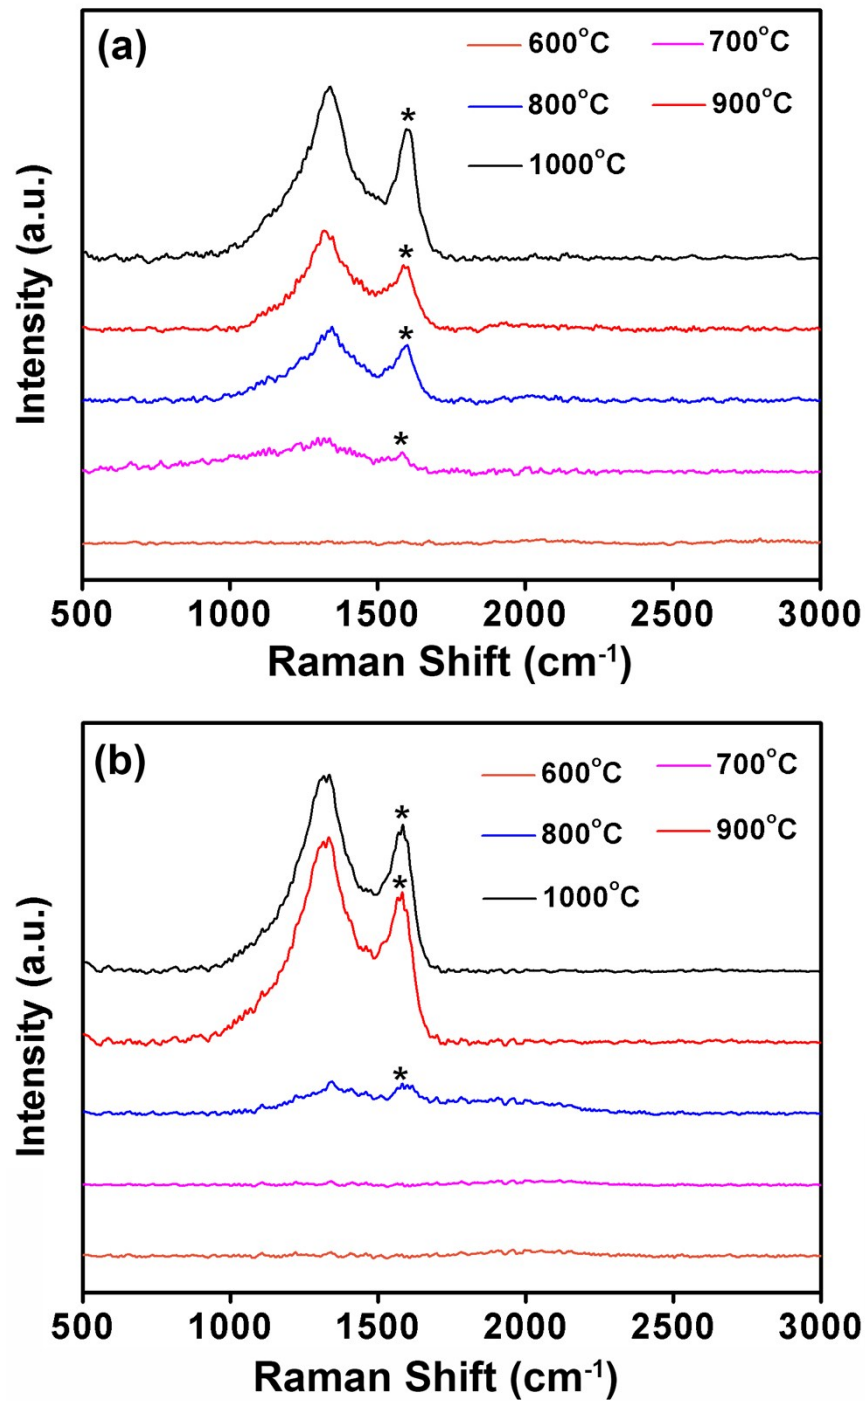

**Fig. S6** Raman spectra of (a) PDC on graphene coated quartz slides after pyrolysis conducted at different temperatures (600 °C, 700 °C, 800 °C, 900 °C, and 1000 °C) and (b) PDC on quartz slides after pyrolysis conducted at different temperatures (600 °C, 700 °C, 800 °C, 900 °C, and 1000 °C). All G band positons are labeled by asterisks.

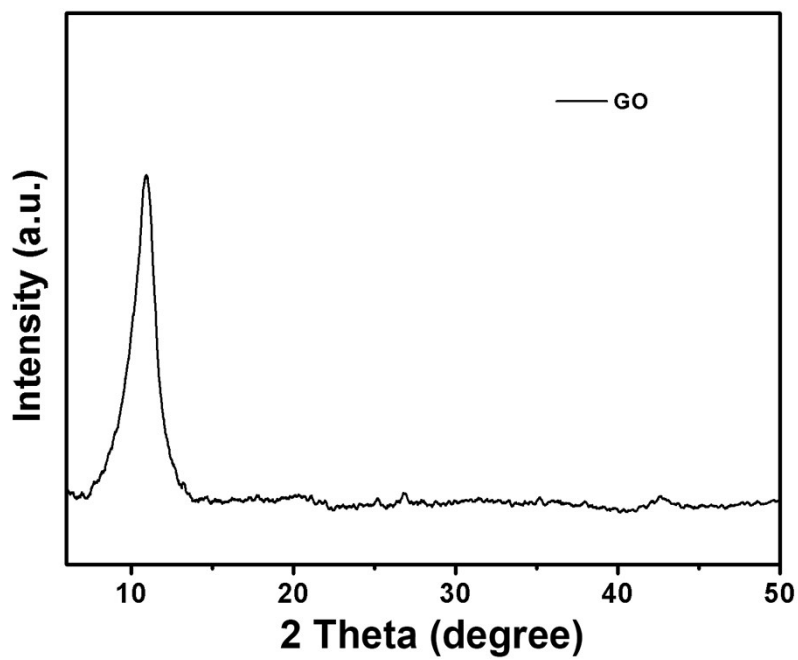

Fig. S7 XRD spectra of GO.

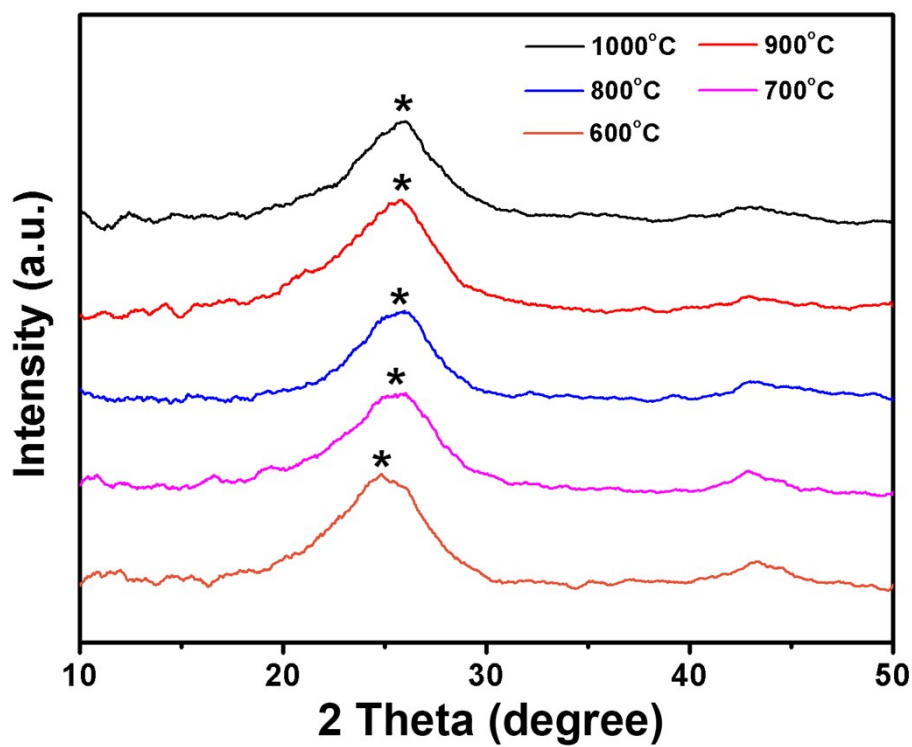

Fig. S8 XRD spectra of GO pyrolyzed at different temperatures.

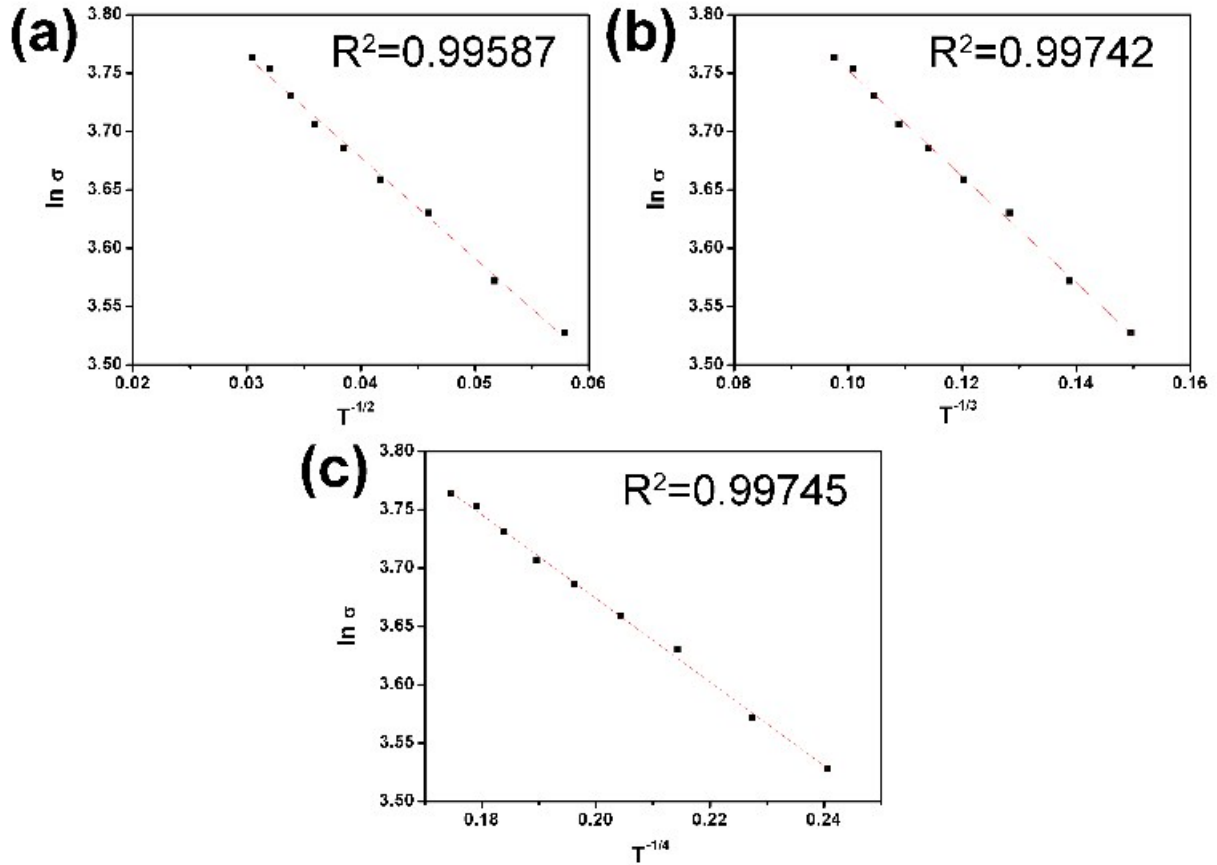

**Fig. S9** Fitting the relationship between conductivity and temperature to the function of (a)  $\sigma \propto T^{-1/2}$ , (b)  $\sigma \propto T^{-1/3}$ , (c)  $\sigma \propto T^{-1/4}$ , respectively.

## REFERENCES

- 1 W. S. Hummers, R.E. Offeman. *J. Am. Ceram. Soc.*, 1958, 80, 1339.
- 2 A.C. Ferrari. *Solid. State. Commun.* 2007, 143, 47.
- 3 Z. Ni, Y. Wang, T. Yu, Z. Shen. *Nano Res.* 2008, 1, 273.
- 4 B. Ryan, C. L. Gustavo, N. Lukas. *J. Phys. Condens. Matter.* 2015, 27, 830.
- 5 K. Sasaki, Y. Tokura, T. Sogawa. *Crystals.* 2013; 3: 120-140.
